# Supplementary material
Source: PubMed Central journal article supplement (PMC3847963)

**Supplemental Table 1: CLL patients' characteristics and clinical treatment.**

| Patients | Sex | Age, yr | Rai stage | Lymph count x 10 <sup>9</sup> /l | WBC count x 10 <sup>9</sup> /l | IgVh mutation (%) | CD38 level (%) | del11 (ATM) | del17 (p53) | Clinical Treatment | Resistance to Clinical Treatment |
|----------|-----|---------|-----------|----------------------------------|--------------------------------|-------------------|----------------|-------------|-------------|--------------------|----------------------------------|
| CLL1     | M   | 74      | II        | 147.9                            | 166.2                          | 0.0               | n.d.           | no          | no          | U                  | N/A                              |
| CLL2     | M   | 53      | II        | 61.7                             | 88.1                           | n.d.              | n.d.           | n.d.        | n.d.        | FCR                | N/A                              |
| CLL3     | M   | 66      | IV        | 95.0                             | 101.6                          | 5.5               | 2.4            | no          | no          | C, R               | Yes                              |
| CLL4     | M   | 80      | III       | 40.6                             | 61.5                           | 0.8               | 36.5           | n.d.        | n.d.        | U                  | N/A                              |
| CLL5     | M   | 70      | II        | 168.7                            | 193.9                          | 0.0               | 2.7            | yes         | no          | U                  | N/A                              |
| CLL6     | F   | 74      | III       | 212.6                            | 265.8                          | 4.0               | 15.7           | n.d.        | n.d.        | F, R               | no                               |
| CLL7     | M   | 88      | n.d.      | 133.1                            | 166.4                          | 3.0               | n.d.           | n.d.        | n.d.        | F                  | yes                              |
| CLL8     | F   | 91      | II        | 60.9                             | 98.3                           | 5.3               | 27.3           | n.d.        | n.d.        | C                  | no                               |
| CLL9     | M   | 74      | 0         | 41.5                             | 52.5                           | 7.2               | 85             | n.d.        | n.d.        | U                  | N/A                              |
| CLL10    | F   | 67      | III       | 41.2                             | 47.4                           | 4.0               | 41.1           | n.d.        | n.d.        | C, F               | no                               |
| CLL11    | M   | 72      | II        | 166.9                            | 199.6                          | 0.0               | 3.6            | no          | no          | U                  | N/A                              |
| CLL12    | F   | 75      | 0         | 73.8                             | 104.0                          | 3.8               | n.d.           | n.d.        | n.d.        | F, R               | yes                              |
| CLL13    | M   | 88      | IV        | 83.7                             | 95.1                           | 0.0               | 85.1           | n.d.        | n.d.        | C                  | yes                              |
| CLL14    | M   | 68      | I         | 39.9                             | 49.3                           | 4.5               | 10.4           | n.d.        | n.d.        | U                  | N/A                              |
| CLL15    | M   | 72      | III       | 59.7                             | 67.1                           | 4.0               | n.d.           | n.d.        | n.d.        | U                  | N/A                              |
| CLL16    | M   | 81      | IV        | 68.1                             | 74.0                           | 11.2              | n.d.           | no          | no          | U                  | N/A                              |
| CLL17    | M   | 83      | IV        | 81.4                             | 92.5                           | 0.0               | 29.6           | n.d.        | n.d.        | C                  | no                               |
| CLL18    | M   | 71      | II        | 55.4                             | 67.5                           | 0.0               | 22.2           | yes         | no          | U                  | N/A                              |
| CLL19    | F   | 70      | IV        | 212.0                            | 230.0                          | 0.0               | n.d.           | yes         | yes         | CHOP               | no                               |
| CLL20    | F   | 90      | n.d.      | 62.2                             | 74.1                           | 2.4               | n.d.           | n.d.        | n.d.        | U                  | N/A                              |
| CLL21    | F   | 57      | III       | 166.5                            | 179.0                          | 12.5              | 2              | n.d.        | n.d.        | U                  | N/A                              |
| CLL22    | F   | 53      | II        | 79.0                             | 94.0                           | 0.0               | n.d.           | n.d.        | n.d.        | FCR                | yes                              |
| CLL23    | M   | 74      | II        | 151.4                            | 166.4                          | 9.1               | 65.5           | no          | no          | C                  | yes                              |
| CLL24    | M   | 96      | IV        | 118.8                            | 129.1                          | 9.4               | n.d.           | n.d.        | n.d.        | C                  | ?                                |
| CLL25    | F   | 55      | n.d.      | 93.5                             | 108.7                          | 0.0               | 25.7           | yes         | no          | U                  | N/A                              |
| CLL26    | F   | 68      | I         | 45.9                             | 65.8                           | 7.8               | 66.6           | n.d.        | n.d.        | U                  | N/A                              |
| CLL27    | F   | 78      | II        | 70.6                             | 106.9                          | 8.0               | 32             | no          | no          | U                  | N/A                              |
| CLL28    | F   | 57      | II        | 152.8                            | 171.7                          | 1.5               | n.d.           | no          | yes         | FCR, A             | yes                              |
| CLL29    | F   | 74      | I         | 169.6                            | 184.3                          | 4.7               | 5.1            | n.d.        | n.d.        | U                  | N/A                              |
| CLL30    | M   | 70      | II        | 90.9                             | 93.2                           | 11.4              | 2.7            | no          | no          | C, F               | yes                              |
| CLL31    | M   | 64      | I         | 65.3                             | 73.4                           | 9.9               | 4.9            | no          | no          | U                  | N/A                              |
| CLL32    | M   | 64      | I         | 56.5                             | 61.4                           | n.d.              | n.d.           | yes         | no          | F, A               | yes                              |
| CLL33    | M   | 67      | IV        | 52.4                             | 56.3                           | 1.0               | n.d.           | no          | no          | FCR                | no                               |
| CLL34    | F   | 87      | 0         | 30.0                             | 42.9                           | n.d.              | n.d.           | n.d.        | n.d.        | U                  | N/A                              |
| CLL35    | F   | 71      | II        | 112.9                            | 128.3                          | 7.0               | 4              | no          | yes         | U                  | N/A                              |
| CLL36    | F   | 47      | IV        | 117.2                            | 126.0                          | 0.0               | 2.3            | no          | no          | U                  | N/A                              |
| CLL37    | F   | 94      | n.d.      | n.d.                             | n.d.                           | 4.9               | n.d.           | n.d.        | n.d.        | U                  | N/A                              |
| CLL38    | M   | 55      | 0         | 270.9                            | 282.2                          | 4.6               | 3              | n.d.        | n.d.        | U                  | N/A                              |

| Patients | Sex | Age, yr | Rai stage | Lymph count x 10 <sup>9</sup> /l | WBC count x 10 <sup>9</sup> /l | IgVh mutation (%) | CD38 level (%) | del11 (ATM) | del17 (p53) | Clinical Treatment | Resistance to Clinical Treatment |
|----------|-----|---------|-----------|----------------------------------|--------------------------------|-------------------|----------------|-------------|-------------|--------------------|----------------------------------|
| CLL39    | F   | 69      | II        | 185.7                            | 199.7                          | 0.1               | n.d.           | no          | no          | C                  | no                               |
| CLL40    | F   | 64      | II        | 170.5                            | 179.5                          | 11.2              | 8.3            | no          | no          | U                  | N/A                              |
| CLL41    | M   | 70      | 0         | 126.3                            | 135.8                          | 0.0               | n.d.           | no          | no          | U                  | N/A                              |
| CLL42    | F   | 77      | II        | 150.6                            | 165.5                          | 0.0               | n.d.           | n.d.        | n.d.        | C                  | no                               |
| CLL43    | M   | 72      | III       | 178.4                            | 191.8                          | 7.2               | n.d.           | no          | no          | C                  | no                               |
| CLL44    | M   | 77      | 0         | 68.6                             | 77.2                           | n.d.              | n.d.           | n.d.        | n.d.        | U                  | N/A                              |
| CLL45    | M   | 90      | III       | 63.6                             | 79.5                           | 0.0               | n.d.           | n.d.        | n.d.        | C                  | ?                                |
| CLL46    | F   | 71      | II        | 61.2                             | 72.0                           | 4.0               | 17             | n.d.        | n.d.        | U                  | N/A                              |
| CLL47    | F   | 78      | II        | 77.1                             | 92.5                           | 6.3               | 3.4            | no          | no          | U                  | N/A                              |
| CLL48    | F   | 83      | IV        | 84.9                             | 141.5                          | 0.0               | 18             | no          | no          | C, F, R            | yes                              |
| CLL49    | F   | 79      | 0         | 28.2                             | 38.1                           | n.d.              | n.d.           | n.d.        | n.d.        | U                  | N/A                              |
| CLL50    | M   | 58      | II        | 186.4                            | 215.0                          | n.d.              | n.d.           | yes         | no          | FCR                | yes                              |
| CLL51    | M   | 78      | IV        | 81.1                             | 89.1                           | 7.4               | 2.8            | no          | no          | U                  | N/A                              |
| CLL52    | M   | 45      | 0         | 83.9                             | 91.0                           | 5.2               | 5.2            | no          | no          | U                  | N/A                              |
| CLL53    | M   | 65      | I         | 64.6                             | 81.8                           | 0.0               | 0              | no          | no          | U                  | N/A                              |
| CLL54    | M   | 85      | III       | 47.8                             | 59.7                           | 0.0               | 0              | n.d.        | n.d.        | U                  | N/A                              |
| CLL55    | F   | 75      | II        | 197.0                            | 209.6                          | 6.4               | 6.4            | no          | no          | CLB                | no                               |
| CLL56    | M   | 81      | 0         | 90.6                             | 116.2                          | 0.0               | n.d.           | n.d.        | n.d.        | P                  | no                               |
| CLL57    | F   | 61      | IV        | 207.9                            | 221.2                          | 0.0               | 64.7           | n.d.        | n.d.        | FCR,CHOP           | yes                              |
| CLL58    | M   | 69      | II        | 77.6                             | 94.6                           | 0.0               | 9.5            | no          | no          | FCR                | no                               |
| CLL59    | M   | 77      | 0         | 214.6                            | 238.4                          | 8.3               | n.d.           | no          | no          | U                  | N/A                              |
| CLL60    | F   | 30      | 0         | n.d.                             | n.d.                           | 6.1               | n.d.           | n.d.        | n.d.        | n.d.               | n.d.                             |
| CLL61    | M   | 74      | 0         | 153.0                            | 182.1                          | 7.8               | n.d.           | no          | no          | C, FCR             | yes                              |
| CLL62    | M   | 89      | I         | 80.4                             | 84.6                           | 9.8               | 2              | no          | no          | U                  | N/A                              |
| CLL63    | M   | 85      | 0         | 24.5                             | 31.9                           | 5.1               | 1.1            | no          | no          | U                  | N/A                              |
| CLL64    | M   | 58      | II        | 58.8                             | 68.4                           | 0.0               | 16             | no          | no          | U                  | N/A                              |
| CLL65    | M   | 66      | 0         | 42.4                             | 50.5                           | 6.7               | 2.4            | n.d.        | n.d.        | U                  | N/A                              |

Summary of the clinical characteristics of 65 B-CLL patients that provided lymphocytes for this work. Rai classification separates CLL into low (stage 0), intermediate (stage I & II) and high (stage III& IV) risk categories. IgVH: Percentage of somatic mutations in the immunoglobulin variable region genes. WBC: white blood count, lymph: lymphocytes, A: Alemtuzumab, C: chlorambucil, F: fludarabine, P: prednisone, FCR: Fludarabine/Cyclophosphamide/Rituximab, CHOP: Cyclophosphamide/Hydroxyldaunorubicin/Oncovin/Prednisone, n.d.: not determined, N/A: Not Applicable.

**Supplemental Table 2: BKM120 and Cal-101 IC<sub>50</sub>s in B-CLL samples.**

| Patients | IC <sub>50</sub> (μM) |         | Patients | IC <sub>50</sub> (μM) |         |
|----------|-----------------------|---------|----------|-----------------------|---------|
|          | BKM120                | Cal-101 |          | BKM120                | Cal-101 |
| CLL1     | 0.3                   |         | CLL34    | 3.4                   | 50.0    |
| CLL2     | 0.4                   |         | CLL35    | 3.9                   |         |
| CLL3     | 0.5                   | 10.5    | CLL36    | 4.7                   | 50.0    |
| CLL4     | 0.5                   |         | CLL37    | 4.8                   |         |
| CLL5     | 0.5                   |         | CLL38    | 4.8                   |         |
| CLL6     | 0.6                   | 2.5     | CLL39    | 5.0                   | 22.4    |
| CLL7     | 0.6                   |         | CLL40    | 5.3                   |         |
| CLL8     | 0.6                   |         | CLL41    | 5.4                   |         |
| CLL9     | 0.7                   |         | CLL42    | 7.1                   |         |
| CLL10    | 0.8                   |         | CLL43    | 8.3                   | 50.0    |
| CLL11    | 0.8                   |         | CLL44    | 9.1                   |         |
| CLL12    | 0.9                   |         | CLL45    | 9.5                   |         |
| CLL13    | 1.0                   |         | CLL46    | 12.3                  |         |
| CLL14    | 1.0                   |         | CLL47    | 12.3                  |         |
| CLL15    | 1.3                   |         | CLL48    | 12.4                  | 50.0    |
| CLL16    | 1.4                   |         | CLL49    | 13.2                  | 50.0    |
| CLL17    | 1.4                   | 50.0    | CLL50    | 19.2                  | 50.0    |
| CLL18    | 1.6                   |         | CLL51    | 19.2                  |         |
| CLL19    | 1.7                   | 3.1     | CLL52    | 20.0                  |         |
| CLL20    | 1.8                   | 6.4     | CLL53    | 20.0                  | 11.4    |
| CLL21    | 1.8                   |         | CLL54    | 20.0                  |         |
| CLL22    | 1.8                   |         | CLL55    | 20.0                  |         |
| CLL23    | 1.9                   | 50.0    | CLL56    | 20.0                  |         |
| CLL24    | 2.2                   | 50.0    | CLL57    | 20.0                  | 3.8     |
| CLL25    | 2.4                   |         | CLL58    | 20.0                  |         |
| CLL26    | 2.5                   |         | CLL59    | 20.0                  |         |
| CLL27    | 2.8                   |         | CLL60    | 20.0                  |         |
| CLL28    | 2.8                   |         | CLL61    | 20.0                  | 50.0    |
| CLL29    | 2.9                   |         | CLL62    | 20.0                  | 50.0    |
| CLL30    | 2.9                   |         | CLL63    | 20.0                  |         |
| CLL31    | 3.1                   |         | CLL64    | 20.0                  |         |
| CLL32    | 3.3                   |         | CLL65    | 20.0                  | 25.8    |
| CLL33    | 3.4                   | 5.7     |          |                       |         |

The MTT assay was used to determine the BKM120 IC<sub>50</sub> (65 samples) and Cal-101 IC<sub>50</sub> (20 samples) in B-lymphocytes isolated from B-CLL patients.

**Supplemental Table 3: Statistics for the CLL patients population involved in this study.**

|                                                                      |                   | # of patients        | % of patients               |
|----------------------------------------------------------------------|-------------------|----------------------|-----------------------------|
| <b>Age</b>                                                           | >65ans            | 50                   | 77%                         |
|                                                                      | <45ans            | 2                    | 3%                          |
|                                                                      | median            | 72                   | N/A                         |
|                                                                      | range (Years)     | 30-96                | N/A                         |
| <b>Sex</b>                                                           |                   | # of patients        | % of patients               |
|                                                                      | F                 | 27                   | 42%                         |
|                                                                      | M                 | 38                   | 58%                         |
|                                                                      | ratio M:F         | 1.4:1                | N/A                         |
| <b>Rai stage<br/>(61 patients tested)</b>                            | <b>Stage</b>      | <b># of patients</b> | <b>% of patients</b>        |
|                                                                      | 0                 | 14                   | 23%                         |
|                                                                      | I                 | 7                    | 11%                         |
|                                                                      | II                | 21                   | 34%                         |
|                                                                      | III               | 8                    | 13%                         |
|                                                                      | IV                | 11                   | 18%                         |
|                                                                      | n.d               | 4                    | N/A                         |
| <b>IgVh mutation (%)<br/>(59 patients tested)</b>                    | <b>Status</b>     | <b># of patients</b> | <b>% of patients tested</b> |
|                                                                      | unmutated         | 24                   | 41%                         |
|                                                                      | mutated           | 35                   | 59%                         |
|                                                                      | n.d               | 6                    | N/A                         |
| <b>CD38 level (%)<br/>(38 patients tested)</b>                       | <b>Status</b>     | <b># of patients</b> | <b>% of patients tested</b> |
|                                                                      | negative          | 30                   | 79%                         |
|                                                                      | positive          | 8                    | 21%                         |
|                                                                      | n.d               | 27                   | N/A                         |
| <b>Cytogenetic deletions</b>                                         | <b># tested</b>   | <b># positive</b>    | <b>% of patients tested</b> |
| none                                                                 | 32                | 6                    | 16%                         |
| del11q                                                               | 32                | 6                    | 19%                         |
| del17p                                                               | 32                | 3                    | 9%                          |
| del13q                                                               | 26                | 15                   | 58%                         |
| <b>Clinical Treatment</b>                                            | <b>treatment</b>  | <b># of patients</b> | <b>% of patients tested</b> |
|                                                                      | untreated         | 36                   | 56%                         |
|                                                                      | treated           | 28                   | 44%                         |
| <b>Resistance to Clinical<br/>Treatment<br/>(15 patients tested)</b> | <b>resistance</b> | <b># of patients</b> | <b>% of patients tested</b> |
|                                                                      | yes               | 13                   | 48%                         |
|                                                                      | no                | 12                   | 44%                         |
|                                                                      | n.d               | 2                    | N/A                         |

n.d.: not determined, N/A: Not Applicable.

The percentages observed for the characteristic markers in our cohort of CLL patients are representative of the CLL population in general<sup>1-5</sup>.

### **References for supplemental Table 3:**

1. Oscier DG, Gardiner AC, Mould SJ, Glide S, Davis ZA, Ibbotson RE, Corcoran MM, Chapman RM, Thomas PW, Copplestone JA, Orchard JA, Hamblin TJ. Multivariate analysis of prognostic factors in CLL: clinical stage, IGVH gene mutational status, and loss or mutation of the p53 gene are independent prognostic factors. *Blood* 2002;100:1177-84.
2. Cramer P, Hallek M. Prognostic factors in chronic lymphocytic leukemia-what do we need to know? *Nat Rev Clin Oncol* 2011;8:38-47.
3. Shanshal M, Haddad RY. Chronic lymphocytic leukemia. *Dis Mon* 2012;58:153-67.
4. Clifford R, Schuh A. State-of-the-Art Management of Patients Suffering from Chronic Lymphocytic Leukemia. *Clin Med Insights Oncol* 2012;6:165-78.
5. Sellner L, Dietrich S, Dreger P, Glimm H, Zenz T. Can prognostic factors be used to direct therapy in chronic lymphocytic leukemia? *Curr Hematol Malig Rep* 2012;7:3-12.

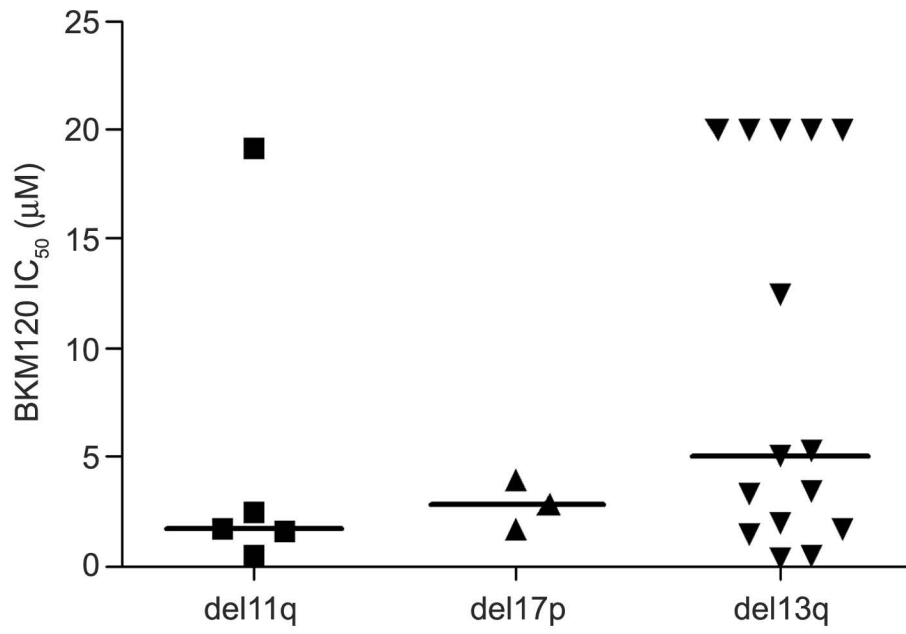

Supplemental Figure 1

**A**

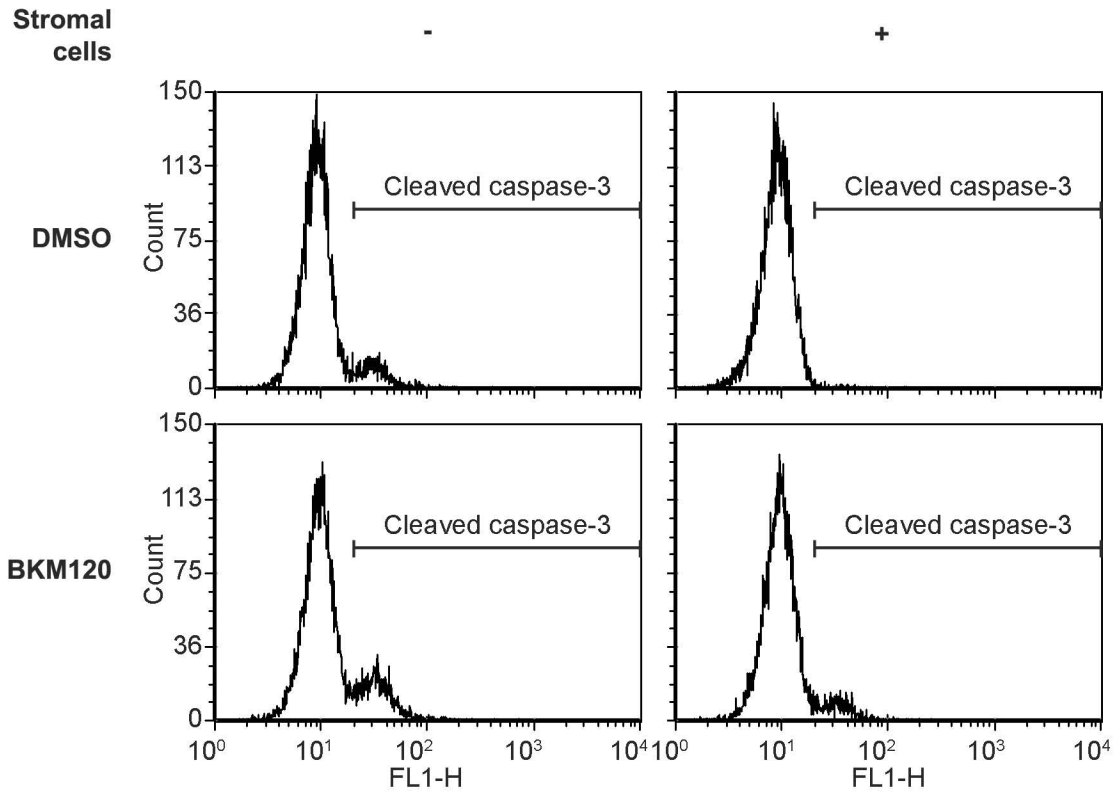

**B**

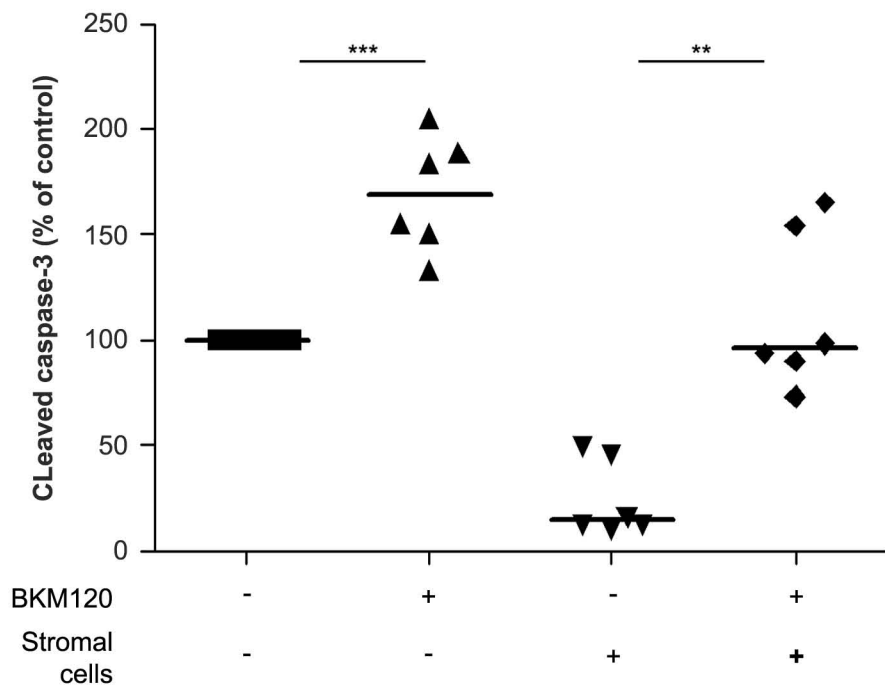

Supplement: NIHMS3702-supplement-supplement_1.pdf [file NIHMS3702-supplement-supplement_1.pdf]
